# Supplementary material for: Persistence of bacterial and archaeal communities in sea ice through an Arctic winter
Source: Environ Microbiol. 2010 Jul;12(7):1828–41. doi: 10.1111/j.1462-2920.2010.02179.x (PMC2916213; doi:10.1111/j.1462-2920.2010.02179.x)
Supplement: Supplementary file 1 [file emi0012-1828-SD1.pdf]

## Supplementary Materials

### Persistence of Bacterial and Archaeal communities in sea ice through an Arctic winter

R. Eric Collins\*, Gabrielle Rocap, and Jody W. Deming

\* corresponding author: R. Eric Collins

School of Oceanography  
Box 357940  
1503 NE Boat St.  
University of Washington  
Seattle, WA 98195 USA  
Tel 1-206-221-5755  
Fax 1-206-543-0275

Submitted to Environmental Microbiology

Running title: Bacteria and Archaea in Arctic winter sea ice

December 27, 2009

**Supplementary Table 1:** Bacterial ARISA OTUs in Franklin Bay (FB) sea ice horizons I–III (representing depths of 25, 45, and 65 cm below the ice surface) and under-ice seawater (SW). Each horizon is ordered by calendar day (left to right). Shown are OTUs that matched the predicted fragment length from a clone library sequence and OTUs present in at least 70% of the sea ice samples, excepting OTUs present in Table 1. A black dot indicates the presence of a peak; alternating gray and white rows are used for clarity. ‘% height’ indicates the percentage of the total global peak height in each OTU.

|      | FB I |    |    | FB II |    |    |    |    |    | FB III | FB SW | %  | Phylotype of best clone library match |                                                                         |
|------|------|----|----|-------|----|----|----|----|----|--------|-------|----|---------------------------------------|-------------------------------------------------------------------------|
|      | 24   | 60 | 74 | 24    | 31 | 38 | 53 | 60 | 67 | 74     | 31    | 88 |                                       | height                                                                  |
| 672  | •    | •  | •  | •     | •  |    | •  | •  | •  | •      | •     | •  | 3.5                                   | —                                                                       |
| 680  | •    | •  | •  | •     |    |    | •  | •  | •  | •      | •     | •  | 3.3                                   | SAR11: B1-a, B2, B4, B5-b, B7, B8;<br>OM182: B17-a                      |
| 816  | •    | •  | •  | •     |    |    | •  | •  | •  | •      | •     |    | 1.4                                   | Alphaproteobacteria: B12;<br>Methylophilus: B24;<br>Polaribacter: B28-b |
| 839  | •    | •  | •  |       | •  | •  |    |    | •  | •      | •     | •  | 1.4                                   | Methylophilus: B23                                                      |
| 820  | •    | •  | •  | •     | •  |    |    |    | •  | •      | •     | •  | 1.0                                   | Chromatiales: B22                                                       |
| 734  | •    | •  | •  |       | •  |    |    |    | •  | •      | •     | •  | 0.8                                   | —                                                                       |
| 595  | •    | •  | •  | •     | •  | •  |    |    | •  |        | •     | •  | 0.7                                   | Cryomorphaceae: B32                                                     |
| 784  | •    |    |    |       |    |    |    |    | •  |        |       |    | 0.7                                   | Polaribacter: B28-a                                                     |
| 1100 | •    | •  | •  |       | •  |    |    |    | •  | •      | •     |    | 0.6                                   | OM182: B18-b                                                            |
| 781  |      |    | •  |       |    |    |    |    |    |        | •     |    | 0.6                                   | Janthinobacterium: B25                                                  |
| 544  | •    | •  | •  |       | •  |    |    |    |    |        | •     | •  | 0.5                                   | Cryomorphaceae: B29                                                     |
| 777  | •    |    | •  |       |    |    |    |    | •  |        | •     |    | 0.5                                   | OM182: B19                                                              |
| 664  | •    |    |    |       |    |    | •  |    |    | •      |       | •  | 0.5                                   | SAR11: B1-b, B3-b, B5-a, B6                                             |
| 801  |      |    | •  |       |    |    |    |    |    |        |       |    | 0.5                                   | Proteobacteria: B27;<br>Actinobacteria: B43                             |
| 551  | •    |    | •  |       |    |    |    |    | •  |        | •     | •  | 0.4                                   | Cryomorphaceae: B29, B31                                                |
| 600  | •    | •  | •  |       | •  | •  |    |    |    |        |       |    | 0.4                                   | Cryomorphaceae: B32                                                     |
| 531  |      | •  | •  |       |    |    |    |    | •  | •      | •     |    | 0.2                                   | Cryomorphaceae: B34                                                     |
| 548  |      |    |    |       |    |    |    |    |    |        |       | •  | 0.2                                   | Cryomorphaceae: B29, B31                                                |
| 779  | •    |    | •  |       |    |    |    |    |    |        |       |    | 0.1                                   | Janthinobacterium: B25                                                  |
| 513  |      | •  |    |       |    |    |    |    |    |        |       |    | 0.1                                   | Saprospira: B40                                                         |
| 775  | •    |    |    |       |    |    |    |    |    |        |       |    | 0.1                                   | Formosa: B38                                                            |
| 623  |      |    |    |       |    |    |    |    | •  | •      | •     |    | 0.1                                   | Marine Group A: B44                                                     |
| 850  |      |    |    |       |    |    |    |    | •  |        | •     |    | 0.1                                   | Polaribacter: B28-c                                                     |
| 697  |      |    | •  |       |    |    |    |    |    |        |       |    | 0.1                                   | Alphaproteobacteria: B13-a;<br>OM182: B17-b                             |
| 825  |      |    |    |       |    |    |    |    | •  |        |       |    | 0.1                                   | Chromatiales: B22                                                       |
| 847  |      |    |    |       |    |    |    |    | •  |        |       | •  | 0.1                                   | Deltaproteobacteria: B26;<br>Polaribacter: B28-c                        |
| 629  |      |    |    |       |    |    |    |    |    |        |       | •  | 0.1                                   | Marine Group A: B44                                                     |
| 676  |      |    | •  |       |    |    |    |    |    |        |       |    | < 0.1                                 | SAR11: B1-a                                                             |
| 769  |      |    |    |       |    |    |    |    |    | •      |       |    | < 0.1                                 | Flavobacteriaceae: B35                                                  |
| 1016 | •    |    |    |       |    |    |    |    |    |        |       |    | < 0.1                                 | Verrucomicrobia: B41                                                    |

**Supplementary Table 2:** Archaeal T-RFLP OTUs in Franklin Bay (FB) sea ice horizons I-III (representing depths of 25, 45, and 65 cm below the ice surface), and under-ice seawater (SW). Each horizon is ordered by calendar day (left to right). Shown are OTUs present in at least 50% of the sea ice samples, and those with at least one peak height greater than 0.25% of the sample's cumulative peak height, excepting OTUs present in Table 2. A black dot indicates the presence of a peak; alternating gray and white rows are used for clarity. '% height' indicates the percentage of the total global peak height in each OTU. Best sequence database matches are demarcated by origin: †, this study; ‡, Galand et al. (2006); and §, GenBank. MGI, Marine Group I Crenarchaeota; MGII, Marine Group II Euryarchaeota; LDS and RC-V refer to clades of uncultured Euryarchaeota.

|     | FB I |    |    | FB II |    |    |    |    |    |    |    | FB III |    |    |    |    |    |    |    | FB SW |    | %  | Taxonomic groups of |        |                                                                     |
|-----|------|----|----|-------|----|----|----|----|----|----|----|--------|----|----|----|----|----|----|----|-------|----|----|---------------------|--------|---------------------------------------------------------------------|
|     | 24   | 60 | 74 | 17    | 24 | 31 | 38 | 53 | 60 | 67 | 74 | 81     | 10 | 17 | 24 | 31 | 53 | 60 | 67 | 74    | 81 | 35 | 88                  | height | best database matches                                               |
| 219 |      |    |    |       |    |    |    |    |    |    |    |        |    |    |    |    | •  |    |    |       |    | •  |                     | 1.0    | —                                                                   |
| 94  |      |    |    |       |    |    |    |    | •  |    |    | •      |    |    |    |    |    |    |    | •     |    | •  |                     | 0.8    | —                                                                   |
| 91  |      |    |    | •     |    |    |    |    |    |    |    |        |    |    |    |    |    |    |    | •     |    |    |                     | 0.8    | MGII.b <sup>†‡</sup> , MGII.a <sup>†‡</sup> , RC-V <sup>†</sup>     |
| 513 |      |    |    | •     |    |    |    |    |    |    |    |        |    |    |    |    |    |    |    | •     |    |    |                     | 0.5    | MGI.3a <sup>†</sup>                                                 |
| 524 | •    | •  |    | •     | •  | •  | •  | •  | •  | •  | •  | •      | •  | •  | •  | •  | •  | •  | •  | •     | •  | •  | •                   | 0.4    | Freshwater Group I.1a <sup>†</sup>                                  |
| 87  | •    |    |    |       | •  |    |    | •  | •  | •  | •  | •      | •  |    |    |    | •  | •  | •  |       |    | •  | •                   | 0.4    | RC-V <sup>†</sup>                                                   |
| 531 |      |    |    | •     |    |    |    |    | •  | •  |    |        | •  |    | •  | •  | •  | •  | •  | •     | •  | •  | •                   | 0.4    | —                                                                   |
| 529 |      |    |    | •     |    |    | •  |    | •  |    |    |        |    |    | •  | •  | •  | •  | •  | •     |    |    |                     | 0.4    | —                                                                   |
| 222 |      | •  |    |       | •  | •  |    | •  | •  |    |    | •      | •  |    | •  | •  | •  | •  | •  | •     | •  | •  | •                   | 0.4    | RC-V <sup>†</sup> , LDS <sup>†</sup>                                |
| 321 |      |    |    |       |    |    |    |    |    |    |    | •      |    |    |    |    |    |    |    |       |    | •  | •                   | 0.3    | —                                                                   |
| 761 | •    | •  | •  | •     | •  | •  | •  | •  | •  | •  | •  | •      |    |    |    | •  | •  | •  | •  | •     | •  | •  | •                   | 0.3    | —                                                                   |
| 282 |      | •  | •  |       |    |    | •  | •  | •  | •  | •  |        |    |    |    | •  |    |    |    | •     |    | •  | •                   | 0.3    | Methanomicrobiales <sup>†§</sup>                                    |
| 461 |      |    |    |       |    |    |    |    |    |    |    | •      |    |    |    |    |    |    |    |       |    | •  |                     | 0.3    | —                                                                   |
| 380 |      | •  | •  | •     | •  |    | •  |    | •  | •  | •  | •      | •  | •  | •  | •  | •  | •  | •  | •     | •  | •  | •                   | 0.2    | —                                                                   |
| 325 |      |    |    | •     |    |    |    |    |    |    |    |        |    |    |    |    |    |    |    |       |    | •  |                     | 0.2    | —                                                                   |
| 516 |      |    |    | •     |    |    |    |    |    |    |    |        |    |    |    |    |    |    |    |       |    | •  |                     | 0.2    | —                                                                   |
| 458 |      |    |    |       |    |    |    |    |    |    |    |        |    |    |    |    | •  |    |    |       |    | •  |                     | 0.2    | —                                                                   |
| 301 |      |    |    |       |    |    |    |    |    |    |    |        |    |    |    |    | •  |    |    |       |    | •  |                     | 0.2    | Desulfurococcales <sup>§</sup>                                      |
| 272 | •    | •  |    | •     | •  |    | •  |    | •  | •  | •  | •      | •  | •  | •  | •  | •  | •  | •  | •     | •  | •  | •                   | 0.2    | —                                                                   |
| 322 |      |    |    | •     |    |    | •  |    |    |    |    | •      |    |    |    |    | •  | •  | •  |       |    | •  |                     | 0.2    | —                                                                   |
| 515 |      | •  |    | •     | •  |    | •  |    | •  |    |    |        |    |    |    |    |    |    |    |       |    |    |                     | 0.2    | MGI.3a <sup>†</sup>                                                 |
| 498 | •    | •  |    | •     | •  |    | •  | •  | •  | •  | •  | •      | •  | •  | •  | •  | •  | •  | •  | •     | •  | •  | •                   | 0.1    | MGI.1c <sup>†‡</sup>                                                |
| 455 | •    |    |    | •     | •  | •  | •  | •  | •  | •  | •  | •      | •  |    |    | •  | •  | •  | •  | •     | •  | •  | •                   | 0.1    | —                                                                   |
| 609 |      | •  |    | •     | •  | •  | •  |    |    |    |    | •      | •  | •  | •  | •  | •  | •  | •  | •     | •  | •  | •                   | 0.1    | <i>Methanococcus</i> <sup>§</sup> , <i>Picrophilus</i> <sup>§</sup> |
| 477 |      |    |    | •     | •  |    |    | •  | •  |    |    |        | •  |    | •  | •  | •  | •  | •  | •     | •  | •  | •                   | 0.1    | Methanobacteria <sup>§</sup>                                        |
| 567 |      |    |    |       |    |    |    |    |    |    |    |        |    |    |    |    |    |    |    |       | •  |    |                     | 0.1    | —                                                                   |
| 287 | •    | •  |    | •     | •  | •  | •  |    | •  | •  | •  | •      | •  | •  | •  | •  | •  | •  | •  | •     | •  | •  | •                   | 0.1    | MGI.3c <sup>†</sup>                                                 |
| 157 | •    |    |    | •     | •  | •  |    |    | •  | •  |    | •      | •  | •  | •  | •  | •  | •  | •  | •     | •  | •  | •                   | 0.1    | —                                                                   |
| 499 |      |    |    | •     | •  | •  | •  | •  | •  | •  | •  | •      | •  |    |    | •  | •  | •  |    |       | •  | •  | •                   | 0.1    | MGI.1c <sup>†‡</sup>                                                |
| 132 | •    |    |    | •     |    |    |    | •  | •  | •  |    | •      | •  |    |    | •  | •  | •  | •  |       |    | •  | •                   | 0.1    | MGI.1a <sup>†</sup>                                                 |
| 137 | •    | •  |    | •     | •  | •  | •  | •  | •  | •  | •  | •      |    |    |    | •  |    | •  |    |       |    | •  |                     | 0.1    | —                                                                   |
| 228 | •    |    |    |       |    |    | •  | •  |    |    |    |        |    |    |    |    |    |    |    |       |    | •  |                     | 0.1    | <i>Thermoplasma</i> <sup>§</sup>                                    |
| 247 |      |    |    |       |    |    |    |    |    |    |    |        |    |    |    |    | •  |    |    |       |    | •  |                     | 0.1    | —                                                                   |
| 231 |      |    |    |       |    |    |    |    |    |    |    |        | •  |    |    |    |    |    |    |       |    |    |                     | 0.1    | —                                                                   |
| 197 |      |    |    |       |    |    |    |    |    |    |    |        |    |    |    |    |    |    |    |       | •  |    |                     | < 0.1  | —                                                                   |

**Supplementary Table 3:** Bacterial phylotypes (defined by >98% 16S rRNA gene similarity) in clone libraries from late winter sea ice (FB04bi) and under-ice seawater (FB04bw). Subtypes were designated by predicted ARISA lengths, calculated for primer pair Uni1392F and R23S-125R. ‘Unknown’ indicates partial sequence for which ARISA length could not be calculated.

| Taxonomy                                   | Phylotype   | Sea ice clones | Seawater clones | ARISA length     |
|--------------------------------------------|-------------|----------------|-----------------|------------------|
| <b>Proteobacteria: Alphaproteobacteria</b> |             |                |                 |                  |
| SAR11                                      | B1-a        | 41             | 16              | 678–683          |
|                                            | B1-b        | 3              | 3               | 661–663, 665–666 |
|                                            | B1-unknown  | 1              | —               | —                |
| SAR11                                      | B2          | 14             | 2               | 680–682          |
| SAR11                                      | B3-a        | 2              | —               | 682              |
|                                            | B3-b        | 3              | —               | 664              |
| SAR11                                      | B4          | 3              | —               | 680              |
| SAR11                                      | B5-a        | 1              | —               | 663              |
|                                            | B5-b        | 2              | —               | 679              |
| SAR11                                      | B6          | 2              | —               | 663              |
| SAR11                                      | B7          | 2              | —               | 681              |
| SAR11                                      | B8          | 1              | —               | 681              |
| SAR11                                      | B9          | 1              | —               | 662              |
| SAR11                                      | B10         | —              | 1               | 662              |
| Sulfitobacter                              | B11-unknown | 1              | —               | —                |
| Roseobacter cluster                        | B12         | 2              | —               | 813              |
| Unclassified                               | B13-a       | 1              | —               | 699              |
|                                            | B13-b       | 1              | —               | 702              |
| Unclassified polar                         | B14         | —              | 1               | 1051             |
| Roseobacter cluster                        | B15-unknown | —              | 1               | —                |
| Roseobacter cluster                        | B16-unknown | —              | 1               | —                |
| <b>Proteobacteria: Gammaproteobacteria</b> |             |                |                 |                  |
| OM182                                      | B17-a       | 2              | 1               | 681–682          |
|                                            | B17-b       | 1              | —               | 695              |
| OM182                                      | B18-a       | 2              | —               | 916–917          |
|                                            | B18-b       | 2              | —               | 1096             |
| OM182                                      | B19         | 2              | —               | 777              |
| OM182                                      | B20         | 1              | —               | 702              |
| OM60                                       | B21-a       | 1              | —               | 979              |
|                                            | B21-unknown | —              | 1               | —                |
| Chromatiales                               | B22         | 1              | —               | 820              |
| <b>Proteobacteria: Betaproteobacteria</b>  |             |                |                 |                  |
| Methylophilus                              | B23         | —              | 1               | 837              |
| Methylophilus                              | B24         | 1              | —               | 816              |
| Janthinobacterium                          | B25         | 1              | —               | 779              |
| <b>Proteobacteria: Deltaproteobacteria</b> |             |                |                 |                  |
| Unclassified                               | B26         | 1              | —               | 844              |
| <b>Proteobacteria: Unclassified</b>        |             |                |                 |                  |
| Unclassified                               | B27         | 1              | —               | 796              |
| <b>Bacteroidetes: Flavobacteria</b>        |             |                |                 |                  |
| Polaribacter                               | B28-a       | 2              | —               | 786              |
| (cont.)                                    |             |                |                 |                  |

| Taxonomy           | Phylotype | Sea ice clones                                | Seawater clones | ARISA length |
|--------------------|-----------|-----------------------------------------------|-----------------|--------------|
|                    | B28-b     | —                                             | 1               | 817          |
|                    | B28-c     | 1                                             | —               | 845          |
|                    | B28-d     | 1                                             | —               | 856          |
| Cryomorphaceae     | B29       | —                                             | 4               | 548–549      |
| Cryomorphaceae     | B30       | —                                             | 1               | 709          |
| Cryomorphaceae     | B31       | —                                             | 1               | 549          |
| Cryomorphaceae     | B32       | —                                             | 1               | 596          |
| Cryomorphaceae     | B33       | —                                             | 1               | 719          |
| Cryomorphaceae     | B34       | —                                             | 1               | 532          |
| Flavobacteriaceae  | B35       | 1                                             | 1               | 770–771      |
| Flavobacteriaceae  | B36       | 1                                             | —               | —            |
| Cellulophaga       | B37       | —                                             | 1               | 1085         |
| Formosa            | B38       | —                                             | 1               | 776          |
|                    |           | <b>Bacteroidetes:</b> Sphingobacteria         |                 |              |
| Unclassified       | B39       | 2                                             | —               | 895          |
| Saprospira         | B40       | —                                             | 3               | 514          |
|                    |           | <b>Verrucomicrobia</b>                        |                 |              |
| Verrucomicrobaceae | B41       | 1                                             | —               | 1012         |
|                    |           | <b>High G+C Gram Positive:</b> Actinobacteria |                 |              |
| Cryobacterium      | B42       | 3                                             | —               | 661–662      |
| Unclassified       | B43       | —                                             | 1               | 796          |
|                    |           | <b>‘Marine Group A’</b>                       |                 |              |
| Unclassified       | B44       | —                                             | 1               | 624          |

**Supplementary Table 4:** Archaeal phylotypes (defined by >99% 16S rRNA gene similarity) in clone libraries from late winter sea ice (FB04ai) and under-ice seawater (FB04aw). Subtypes were designated by predicted TRF lengths, calculated for primer/enzyme combination Arch109F/HpyCH4III. ‘Unknown’ indicates partial sequence for which TRF length could not be calculated.

| Taxonomy                             | Phylotype  | Sea ice clones | Seawater clones | TRF length |
|--------------------------------------|------------|----------------|-----------------|------------|
| <b>Crenarchaeota: Marine Group I</b> |            |                |                 |            |
| Cluster 1a                           | A3-a       | 34             | 31              | 527–528    |
|                                      | A3-b       | 1              | —               | 132        |
|                                      | A3-unknown | 8              | 4               | —          |
| Cluster 1a                           | A4-a       | 1              | 1               | 528        |
|                                      | A4-unknown | 1              | 2               | —          |
| Cluster 1a                           | A5         | 1              | 1               | 528        |
| Cluster 1a                           | A6         | —              | 1               | 528        |
| Cluster 1c                           | A7         | —              | 1               | 499        |
| <b>Euryarchaeota: Group II.b</b>     |            |                |                 |            |
| Cluster 7                            | A1-a       | 4              | 2               | 93         |
|                                      | A1-unknown | —              | 1               | —          |
| Cluster 5                            | A2         | 2              | 1               | 93         |

**Supplementary Table 5:** Primers used in this study. Universal name as described by Alm et al. (1996).

| Common name | Universal name       | Sequence (5'-3')     | Usage                                  | Reference                          |
|-------------|----------------------|----------------------|----------------------------------------|------------------------------------|
| Arch21F     | S-D-Arch-0002-a-S-20 | TTCCGGTTGATCCYGCCGGA | Archaeal cloning                       | DeLong (1992)                      |
| Arch109F    | S-D-Arch-0109-a-S-17 | ACKGCTCAGTAACAAGT    | T-RFLP                                 | Grosskopf et al. (1998)            |
| Arch915R    | S-D-Arch-0915-a-A-20 | GTGCTCCCCGCCAATTCCT  | T-RFLP                                 | Stahl and Amann (1991)             |
| Arch958R    | S-D-Arch-0958-a-A-19 | YCCGGCGTTGAMTCCAATT  | Archaeal cloning                       | DeLong (1992)                      |
| Uni515F     | S*-Uni-0515-a-S-19   | GTGCCAGCMGCCGCGGTAA  | Archaeal sequencing, Bacterial cloning | Lane (1991)                        |
| Uni515R19   | S*-Uni-0515-a-A-19   | TTACCGCGGCKGCTGGCAC  | Archaeal sequencing                    | Lane (1991)                        |
| Uni1392F    | S*-Uni-1392-a-S-15   | GYACACACCGCCCGT      | Bacterial sequencing, ARISA            | Hewson and Fuhrman (2004)          |
| Uni1392R    | S*-Uni-1392-a-A-15   | ACGGGCGGTGTGTRC      | Bacterial sequencing                   | Field et al. (1988)                |
| R23S-125R   | L-D-Bact-0125-a-A-15 | GGTTBYCCCATTCRG      | Bacterial cloning, ARISA               | modification of Hunt et al. (2006) |
| M13F        | —                    | GTAAACGACGGCCAG      | Archaeal and Bacterial sequencing      | Invitrogen                         |
| M13R        | —                    | CAGGAAACAGCTATGAC    | Archaeal and Bacterial sequencing      | Invitrogen                         |

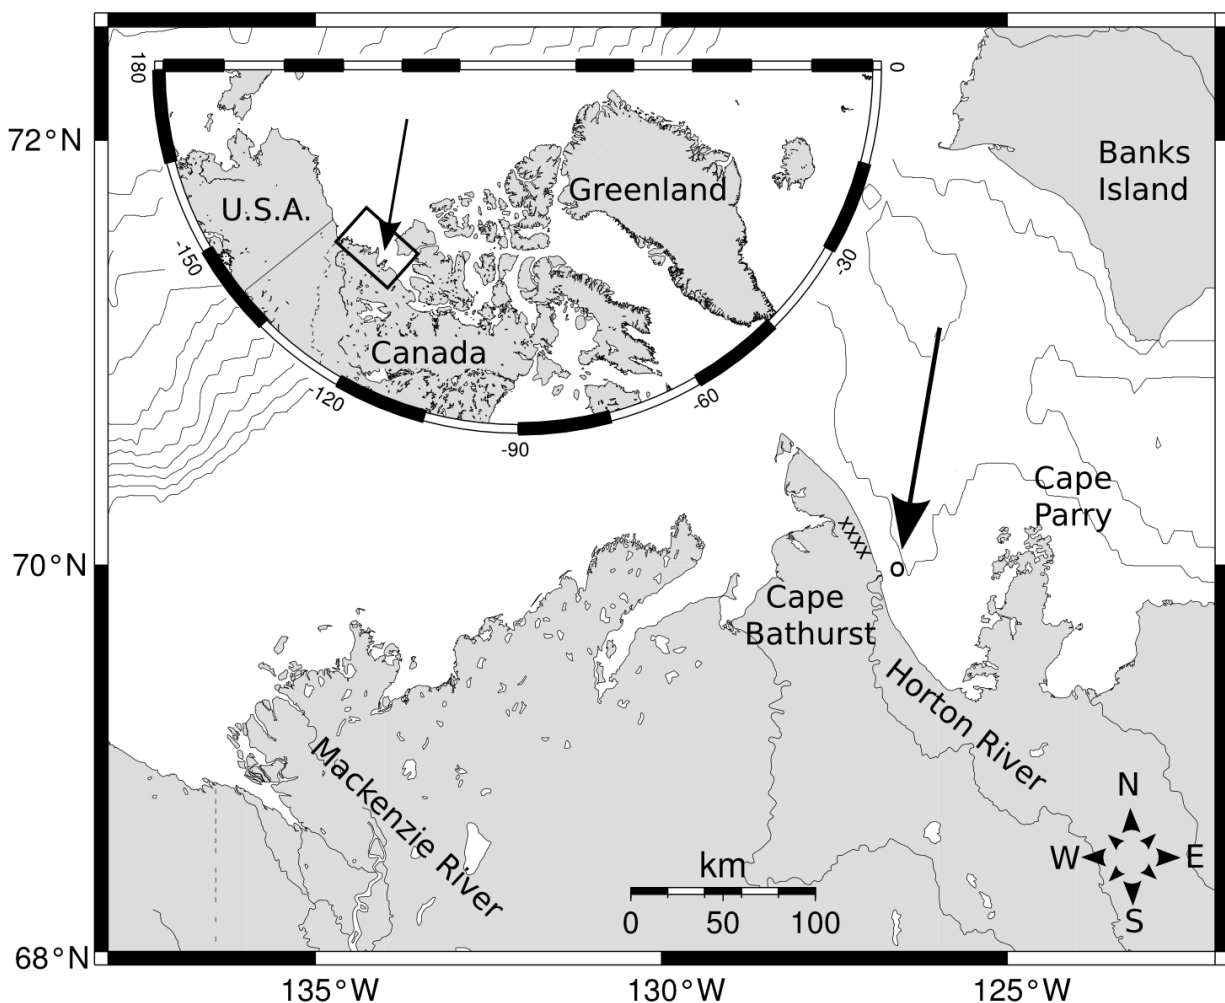

**Supplementary Figure 1:** Map of the vicinity of Franklin Bay, Northwest Territories, Canada, indicating Franklin Bay (arrows), the primary sampling site at the CCGS *Amundsen* overwintering station (o) and nearby Smoking Hills (x).

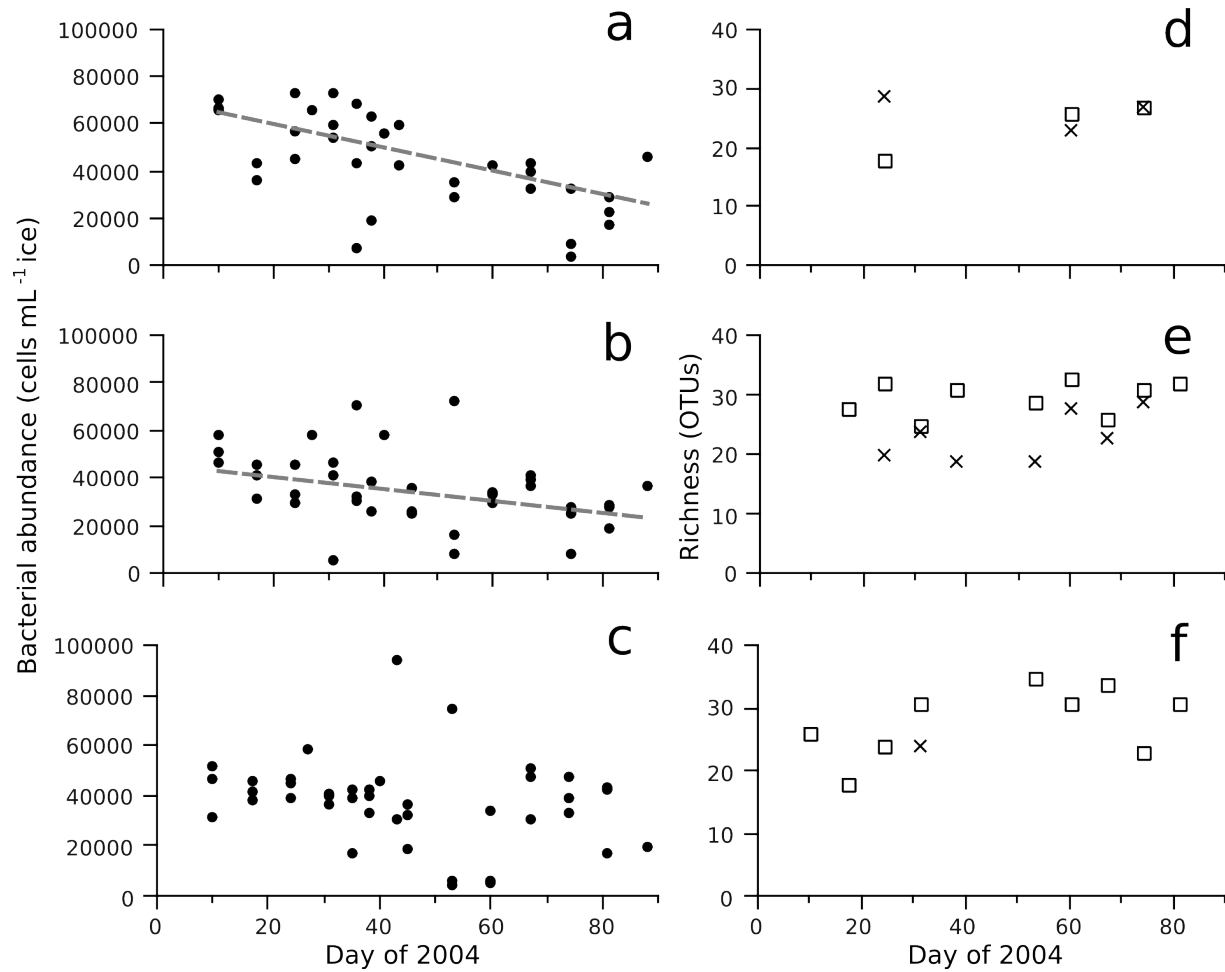

**Supplementary Figure 2:** Bacterial abundance (a–c) from Collins et al. (2008), and the community richness (d–f) of Bacteria (×, 98% similarity cutoff) and Archaea (□, 99% similarity cutoff) in Arctic winter sea ice horizons I–III, representing depths of 25, 45, and 65 cm below the ice surface (top, middle, and bottom panels, respectively). Dashed lines in (a) and (b) indicate robust linear best fit lines in horizons with statistically significant decreases ( $p < 0.05$ ) in cell abundance over time. Pearson correlation coefficients of richness over time were not significant for either community in any horizon.

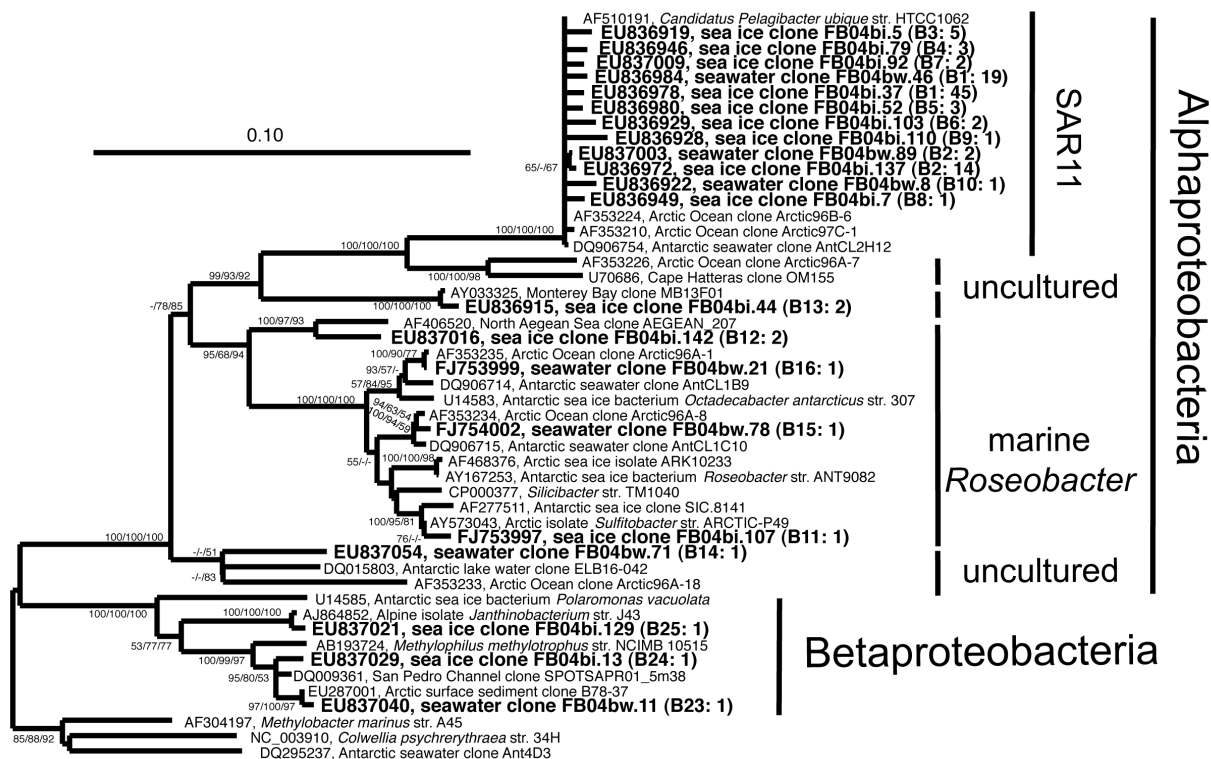

**Supplementary Figure 3:** Phylogenetic tree of alphaproteobacterial and betaproteobacterial 16S rRNA gene sequences. Tree topology was defined by the consensus of 1000 maximum parsimony bootstrap replications utilizing 291 parsimony-informative nucleotides. Branch lengths were defined by Tamura-Nei distances calculated from 558 hypervariable-masked nucleotides. Node values indicate percentage of 10000 distance, 1000 maximum parsimony, and 100 maximum likelihood bootstrap replications, respectively; only bootstrap values greater than 50% are shown. One sequence from each phylotype (defined by >98% similarity) from each library in this study is shown in bold, followed in parentheses by the phylotype and number of sequences from each library within that phylotype.

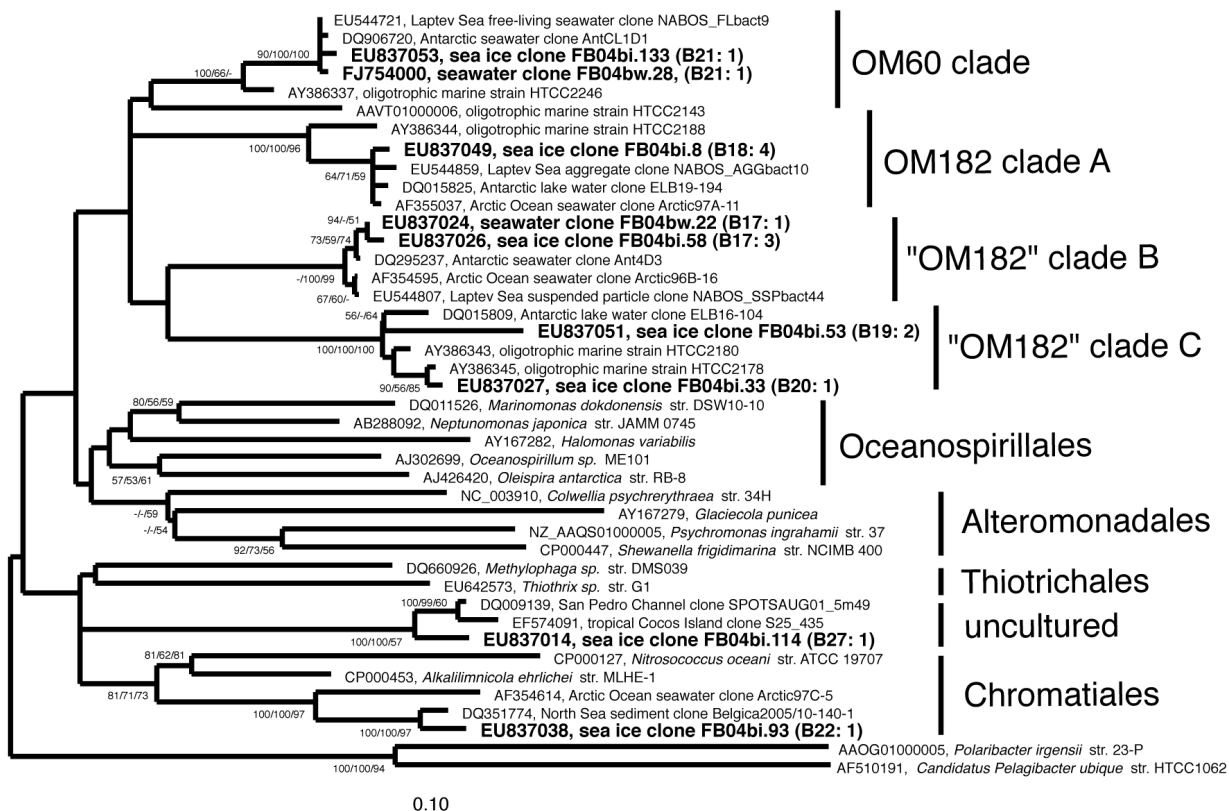

**Supplementary Figure 4:** Phylogenetic tree of gammaproteobacterial 16S rRNA gene sequences. Tree topology was defined by the consensus of 1000 maximum parsimony bootstrap replications utilizing 240 parsimony-informative nucleotides. Branch lengths were defined by Tamura-Nei distances calculated from 570 hypervariable-masked nucleotides. Other features as in Fig. S3.

## References

- Alm, E.W., Oerther, D.B., Larsen, N., Stahl, D.A., and Raskin, L. (1996) The oligonucleotide probe database. *Appl Environ Microbiol* 62:3557–3559.
- Collins, R.E., Carpenter, S.D., and Deming, J.W. (2008) Spatial heterogeneity and temporal dynamics of particles, bacteria, and pEPS in Arctic winter sea ice. *J Mar Sys* 74:902–917.
- DeLong, E.F. (1992) Archaea in coastal marine environments. *Proc Natl Acad Sci U S A* 89:5685–5689.
- Field, K.G., Olsen, G.J., Lane, D.J., Giovannoni, S.J., Ghiselin, M.T., Raff, E.C., et al. (1988) Molecular phylogeny of the animal kingdom. *Science* 239:748–753.
- Galand, P.E., Lovejoy, C., and Vincent, W.F. (2006) Remarkably diverse and contrasting archaeal communities in a large Arctic river and the coastal Arctic Ocean. *Aquat Microb Ecol* 44:115–126.
- Grosskopf, R., Janssen, P.H., and Liesack, W. (1998) Diversity and structure of the methanogenic community in anoxic rice paddy soil microcosms as examined by cultivation and direct 16S rRNA gene sequence retrieval. *Appl Environ Microbiol* 64:960–969.
- Hewson, I. and Fuhrman, J.A. (2004) Richness and diversity of bacterioplankton species along an estuarine gradient in Moreton Bay, Australia. *Appl Environ Microbiol* 70:3425–3433.
- Hunt, D.E., Klepac-Ceraj, V., Acinas, S.G., Gautier, C., Bertilsson, S., and Polz, M.F. (2006) Evaluation of 23S rRNA PCR primers for use in phylogenetic studies of bacterial diversity. *Appl Environ Microbiol* 72:2221–2225.
- Lane, D.J. (1991) 16S/23S rRNA sequencing. In *Nucleic Acid Techniques in Bacterial Systematics* (Stackebrandt, E. and Goodfellow, M., eds.). New York: Wiley, 115–175.
- Stahl, D.A. and Amann, R. (1991) Development and application of nucleic acid probes. In *Nucleic Acid Techniques in Bacterial Systematics* (Stackebrandt, E. and Goodfellow, M., eds.). John Wiley & Sons Ltd., Chichester, United Kingdom, 205–248.
